# Supplementary material
Source: HighWire-hosted journal article supplement (https://openres.ersjournals.com/content/7/1/00497-2020)
Supplement: inline-supplementary-material-1 [file inline-supplementary-material-1.pdf]

# Novel Asthma Medication Study

Patient ID: \_\_\_\_\_  
Date \_\_\_\_\_

## Clinical scenarios

**“There are different medicines that may work for you to help treat your severe asthma. We would like to understand what is most important to you in terms of your asthma medicines. To help us understand this, I’m going to ask you present you with a series of scenarios, in which you can choose one of four different medications. There are no right or wrong answers here, we just want to get an understanding of what you want from your severe asthma medicine”.**

# Novel Asthma Medication Study

Patient ID: \_\_\_\_\_

Date \_\_\_\_\_

## 1. Outcomes

### 1.1 Outcome properties

“Below we have provided some information about each of these treatments. We would like you to consider each of the medications and tell us which medication most meets your preferences”.

| Asthma Outcomes                                                                                                                                                         | Medication A                                                          | Medication B                                                  | Medication C                                                     | Medication D                                                      |
|-------------------------------------------------------------------------------------------------------------------------------------------------------------------------|-----------------------------------------------------------------------|---------------------------------------------------------------|------------------------------------------------------------------|-------------------------------------------------------------------|
| I am likely to have fewer bad attacks                                                                                                                                   | On average, my bad asthma attacks would reduce by just over one third | On average, my bad asthma attacks would reduce by about half. | On average, my bad asthma attacks would reduce by more than half | On average, my bad asthma attacks would reduce by just under half |
| I am likely to have an improvement in the control of my asthma (for example, have less symptoms)                                                                        | 😊                                                                     | 😊                                                             | 😊                                                                | 😊                                                                 |
| I am likely to achieve an improvement in how my asthma symptoms affects my daily life (such as having to avoid social situations, completing my daily tasks of living). | 😊😊                                                                    | 😊😊                                                            | 😊😊😊                                                              | 😊                                                                 |
| I am likely to reduce my oral steroids (prednisone)                                                                                                                     | On average my steroid dose would reduce by just under half            | On average my steroid dose would reduce by half               | On average my steroid dose would reduce by up to three quarters  | Steroid reduction not known                                       |
| <b>Thinking about the above information, which medication would you choose? (Rank 1 (this is the one I want!) to 4 (this is the one I would prefer least))</b>          |                                                                       |                                                               |                                                                  |                                                                   |
| <b>What was the main reason you chose that medication?</b>                                                                                                              |                                                                       |                                                               |                                                                  |                                                                   |

**Key:** 😊 improves a little 😊😊 improves a fair bit 😊😊😊 improves a lot

# Novel Asthma Medication Study

Patient ID: \_\_\_\_\_

Date \_\_\_\_\_

## 1.2 Logistics

“Some of the new asthma medications are given via injection, instead of the traditional inhaler device. Thinking about the logistics below please tell us which medication most meets your preferences.”

| Logistics                                                                                                                                             | Medication A                                                                                                                      | Medication B                                                                                                                     | Medication C                                                                                                                                                         | Medication D |
|-------------------------------------------------------------------------------------------------------------------------------------------------------|-----------------------------------------------------------------------------------------------------------------------------------|----------------------------------------------------------------------------------------------------------------------------------|----------------------------------------------------------------------------------------------------------------------------------------------------------------------|--------------|
| Mode of delivery (how you take your medicine)                                                                                                         | Subcutaneous injection (in your tummy)                                                                                            | Subcutaneous Injection (in your tummy)                                                                                           | Subcutaneous injection (in your tummy)                                                                                                                               | Oral tablet  |
| Time commitment (how long it takes to receive your medicine)                                                                                          | Every 4 weeks, remain in the hospital or doctor’s office for 2 hours post the first injection, then 30 thereafter for observation | Every 4 weeks, remain in the hospital or doctor’s office for 1 hour post the first injection, then 30 thereafter for observation | Every 4 weeks for the first 3 doses, followed by once every 8 weeks thereafter. Remain for 1 hour post injection for observation, then 30 thereafter for observation | < 1 minute   |
| Location of treatment (where you take it)                                                                                                             | Severe asthma clinic for first 3 doses and then your GP for follow-up doses.                                                      | Severe asthma clinic for first 3 doses and then your GP for follow-up doses.                                                     | Severe asthma clinic for first 3 doses and then your GP for follow-up doses.                                                                                         | Home         |
| Availability of treatment (where you get it from)                                                                                                     | Pharmacy                                                                                                                          | Pharmacy                                                                                                                         | Pharmacy                                                                                                                                                             | Pharmacy     |
| <b>Thinking about these things, which medication would you choose? (Rank 1 (this is the one I want!) to 4 (this is the one I would prefer least))</b> |                                                                                                                                   |                                                                                                                                  |                                                                                                                                                                      |              |
| <b>What was the main reason you chose that medication?</b>                                                                                            |                                                                                                                                   |                                                                                                                                  |                                                                                                                                                                      |              |

# Novel Asthma Medication Study

Patient ID: \_\_\_\_\_

Date \_\_\_\_\_

## 1.3 Side effects

*“Thinking about some common medication side effects of the proposed medications, tell us which medication you would prefer”*

| Side effect                                                                                                                                           | Medication A | Medication B            | Medication C            | Medication D            |
|-------------------------------------------------------------------------------------------------------------------------------------------------------|--------------|-------------------------|-------------------------|-------------------------|
| Headache                                                                                                                                              | Common       | Common                  | Common                  | Less common             |
| Sore throat                                                                                                                                           | Common       | Less common             | Common                  | Rare                    |
| Allergic reaction (severe reaction)                                                                                                                   | Rare         | Rare                    | Rare                    | Rare                    |
| Injection site pain                                                                                                                                   | Common       | Common                  | Common                  | None                    |
| Weight increase                                                                                                                                       | Common       | Not a known side effect | Not a known side effect | Not a known side effect |
| Nausea                                                                                                                                                | Common       | Less common             | Not a known side effect | Rare                    |
| Diarrhoea                                                                                                                                             | Less common  | Less common             | Not a known side effect | Common                  |
| Fatigue                                                                                                                                               | Less common  | Common                  | Not a known side effect | Less common             |
| Rash                                                                                                                                                  | Common       | Less common             | Less common             | Less common             |
| <b>Thinking about these things, which medication would you choose? (Rank 1 (this is the one I want!) to 4 (this is the one I would prefer least))</b> |              |                         |                         |                         |
| <b>What was the main reason you chose that medication?</b>                                                                                            |              |                         |                         |                         |

## 2. Overall: Now thinking about all the aspects of the medications, which one would you be most likely to choose?

| Asthma Outcomes                                                                                                                                                          | Medication A                                                                                                                      | Medication B                                                                                                                     | Medication C                                                                                                                                         | Medication D                                                     |
|--------------------------------------------------------------------------------------------------------------------------------------------------------------------------|-----------------------------------------------------------------------------------------------------------------------------------|----------------------------------------------------------------------------------------------------------------------------------|------------------------------------------------------------------------------------------------------------------------------------------------------|------------------------------------------------------------------|
| I am likely to have fewer bad attacks                                                                                                                                    | On average my bad asthma attacks would reduce by just over one third                                                              | On average my bad asthma attacks would reduce by about half                                                                      | On average my bad asthma attacks would reduce by more than half                                                                                      | On average my bad asthma attacks would reduce by just under half |
| I am likely to have an improvement in asthma control (for example, have less symptoms)                                                                                   | ☺                                                                                                                                 | ☺                                                                                                                                | ☺                                                                                                                                                    | ☺                                                                |
| I am likely to achieve an improvement in how my asthma symptoms impact my daily life (such as having to avoid social situations, completing your daily tasks of living). | ☺☺                                                                                                                                | ☺☺                                                                                                                               | ☺☺☺                                                                                                                                                  | ☺                                                                |
| I am likely to reduce my oral steroids (prednisone)                                                                                                                      | On average my steroid dose would reduce by just under half                                                                        | On average my steroid dose would reduce by half                                                                                  | On average my steroid dose would reduce by up to three quarters                                                                                      | Steroid reduction not known                                      |
| <b>Logistics</b>                                                                                                                                                         |                                                                                                                                   |                                                                                                                                  |                                                                                                                                                      |                                                                  |
| Mode of delivery                                                                                                                                                         | Subcutaneous injection (in your tummy)                                                                                            | Subcutaneous Injection (in your tummy)                                                                                           | Subcutaneous injection (in your tummy)                                                                                                               | Oral tablet                                                      |
| Time commitment                                                                                                                                                          | Every 4 weeks, remain in the hospital or doctor's office for 2 hours post the first injection, then 30 thereafter for observation | Every 4 weeks, remain in the hospital or doctor's office for 1 hour post the first injection, then 30 thereafter for observation | Every 4 weeks for the first 3 doses, followed by once every 8 weeks thereafter. Remain for 1 hour post injection, then 30 thereafter for observation | < 1 minute                                                       |
| Location of treatment (where you take it)                                                                                                                                | Severe asthma clinic for first 3 doses and then continue or go to GP                                                              | Severe asthma clinic for first 3 doses and then continue or go to GP                                                             | Severe asthma clinic for first 3 doses and then continue or go to GP                                                                                 | Home                                                             |
| Availability of treatment (where you get it from)                                                                                                                        | Pharmacy                                                                                                                          | Pharmacy                                                                                                                         | Pharmacy                                                                                                                                             | Pharmacy                                                         |
| <b>Side effects</b>                                                                                                                                                      |                                                                                                                                   |                                                                                                                                  |                                                                                                                                                      |                                                                  |
| Headache                                                                                                                                                                 | Common                                                                                                                            | Common                                                                                                                           | Common                                                                                                                                               | Less common                                                      |
| Sore throat                                                                                                                                                              | Common                                                                                                                            | Less common                                                                                                                      | Common                                                                                                                                               | Rare                                                             |
| Allergic reaction (severe reaction)                                                                                                                                      | Rare                                                                                                                              | Rare                                                                                                                             | Rare                                                                                                                                                 | Rare                                                             |
| Injection site pain                                                                                                                                                      | Common                                                                                                                            | Common                                                                                                                           | Common                                                                                                                                               | None                                                             |
| Weight increase                                                                                                                                                          | Common                                                                                                                            | Not a known side effect                                                                                                          | Not a known side effect                                                                                                                              | Not a known side effect                                          |
| Nausea                                                                                                                                                                   | Common                                                                                                                            | Less common                                                                                                                      | Not a known side effect                                                                                                                              | Rare                                                             |
| Diarrhoea                                                                                                                                                                | Less common                                                                                                                       | Less common                                                                                                                      | Not a known side effect                                                                                                                              | Common                                                           |
| Fatigue                                                                                                                                                                  | Less common                                                                                                                       | Common                                                                                                                           | Not a known side effect                                                                                                                              | Less common                                                      |
| Rash                                                                                                                                                                     | Common                                                                                                                            | Less common                                                                                                                      | Less common                                                                                                                                          | Less common                                                      |
| <b>Thinking about all these things, which medication would you choose? (rank 1 – 4)</b>                                                                                  |                                                                                                                                   |                                                                                                                                  |                                                                                                                                                      |                                                                  |
| <b>What was the main reason you chose that medication?</b>                                                                                                               |                                                                                                                                   |                                                                                                                                  |                                                                                                                                                      |                                                                  |

# Novel Asthma Medication Study

Patient ID: \_\_\_\_\_  
 Date \_\_\_\_\_

### 3. Cost

“There are direct costs (like paying for a medication) and indirect costs (like the cost of petrol or public transport to attend a medical appointment) associated with managing a chronic illness, such as severe asthma”.

“Thinking about direct and indirect costs how much does cost influence your decision-making in what medication you would prefer to take?”

“In the box below, please indicate how burdensome each cost is to you using the key below from 0 (no burden) to 3 (very burdensome).”

Once you have done that, please rank them in order in relation to each other from 1 (most important) to 3 (least important)”.

|                                                                                  | Rank the burden (0-6) of each outcome using the key below                            | Now order from 1-3 in order of most important (1) to least important (3) |
|----------------------------------------------------------------------------------|--------------------------------------------------------------------------------------|--------------------------------------------------------------------------|
| 1. The cost to get to the appointment (public transport, petrol, tolls, parking) | 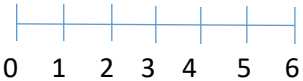 |                                                                          |
| 2. The cost of the appointment (GP fees, specialist fees)                        |  |                                                                          |
| 3. The cost of the medicine at the pharmacy                                      |  |                                                                          |

**Scale 0 = “I don’t care/this cost does not apply to me” to 6 “this would be very burdensome”**

# Novel Asthma Medication Study

Patient ID: \_\_\_\_\_

Date \_\_\_\_\_

## 4. Ranking the domains

“Overall, thinking about the factors that go into making a decision about which medications you were prefer to take please rate the following factors in terms of their importance from 1 (most important) to 4 (least important)”.

|                                                                                                                                                                                                                        | Now order from 1-4 in order of most important (1) to least important (4) |
|------------------------------------------------------------------------------------------------------------------------------------------------------------------------------------------------------------------------|--------------------------------------------------------------------------|
| 1. <b>Asthma outcomes</b> , such as improvement in your asthma symptoms; improvement in how your asthma impacts your life; and/or the ability of the new medication to allow you to reduce the oral steroids you take. |                                                                          |
| 2. How you <b>take your medication</b> (administered in the Dr’s office/clinic versus self-administered at home), injection versus tablet                                                                              |                                                                          |
| 3. The <b>side effects</b> of the medication, for example, are fewer side effects is more likely to make you choose the medication                                                                                     |                                                                          |
| 4. The <b>cost</b> associated with taking the medication (direct and indirect costs)                                                                                                                                   |                                                                          |
| <b>Why was _____ the most important to you?</b>                                                                                                                                                                        |                                                                          |

# Novel Asthma Medication Study

Patient ID: \_\_\_\_\_

Date \_\_\_\_\_

## 5. Patient outcomes

**“To see if a medication is working for you to improve your asthma, we want to understand what would most likely change or improve when you start using the new medicine”.**

**“Sometimes the Doctors and Nurses will measure how well your lungs are working, or measure your blood to see how you are responding to a new medication, but we want to know what are the important improvements to your life as a result of taking a new medication”**

**“In answering the following questions, think about what areas of improvement would be most important to you. Are any areas more important than others?”**

**“In the box, please indicate how important each outcome is to you using the key below, from 0 (not very important/don’t care) to 6 (very important).”**

**“Once you have done that, please rank the top five things you consider the most important, start at 1 for the most important overall.”**

**Scale 0 = “I don’t care, this doesn’t worry me” to 6 = “this is very important to me”.**



# Novel Asthma Medication Study

Patient ID: \_\_\_\_\_

Date \_\_\_\_\_

|                                                                                      | <p><b>Rank the importance (0-6) of each outcome using the key below</b></p> <p><b>Scale: 0 = "I don't care, this doesn't worry me" to 6 = "this is very important to me".</b></p> | <p><b>Now nominate the top five things that you consider the most important, starting at 1 for the most important thing</b></p> |
|--------------------------------------------------------------------------------------|-----------------------------------------------------------------------------------------------------------------------------------------------------------------------------------|---------------------------------------------------------------------------------------------------------------------------------|
| 1. I want the medication to reduce the number and severity of asthma attacks I have. | 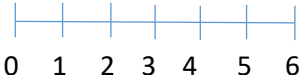                                                                                                |                                                                                                                                 |
| 2. I want to improve my overall quality of life.                                     |                                                                                                 |                                                                                                                                 |
| 3. I want to have fewer hospital admissions.                                         |                                                                                                 |                                                                                                                                 |
| 4. I want to improve my workplace attendance and productivity.                       |                                                                                                 |                                                                                                                                 |
| 5. I want to be able to do more physical activity.                                   |                                                                                                |                                                                                                                                 |
| 6. I want to be able to sleep better.                                                |                                                                                               |                                                                                                                                 |
| 7. I want to be able to be more social.                                              |                                                                                               |                                                                                                                                 |
| 8. I want to be able to exercise more.                                               |                                                                                               |                                                                                                                                 |
| 9. I want to be able to take less oral steroids.                                     |                                                                                               |                                                                                                                                 |
| 10. I want to have less wheeze.                                                      |                                                                                               |                                                                                                                                 |
| 11. I want to cough less.                                                            |                                                                                               |                                                                                                                                 |
| 12. I want to be less breathless.                                                    |                                                                                               |                                                                                                                                 |
| 13. I want to be less tired.                                                         |                                                                                               |                                                                                                                                 |
| 14. I want to reduce my pain.                                                        |                                                                                               |                                                                                                                                 |
| 15. I want to worry less.                                                            |                                                                                               |                                                                                                                                 |
| 16. I want my asthma to be more predictable.                                         |                                                                                               |                                                                                                                                 |
| 17. I want to be able to participate in work (paid or unpaid).                       |                                                                                               |                                                                                                                                 |

# Novel Asthma Medication Study

Patient ID: \_\_\_\_\_

Date \_\_\_\_\_

**Are there any other outcomes that are important to you that you would like a medication to address?** \_\_\_\_\_

---

---

---

---

---

---

## Final thoughts

**Are there any other factors of which you think are important to consider when choosing between two or more medication choices?**

---

---

---

---

---

---

---

---

---

---

---
